# Supplementary material
Source: PubMed Central journal article supplement (PMC4944789)
Supplement: mmc1.pdf [file mmc1.pdf]

## Gun Violence, African Ancestry, and Asthma

### A Case-Control Study in Puerto Rican Children

*Christian Rosas-Salazar, MD, MPH; Yueh-Ying Han, PhD; John M. Brehm, MD, MPH;  
Erick Forno, MD, MPH; Edna Acosta-Pérez, PhD; Michelle M. Cloutier, MD;  
María Alvarez, MD; Angel Colón-Semidey, MD; Glorisa Canino, PhD;  
and Juan C. Celedón, MD, DrPH, FCCP*

CHEST 2016; 149(6):1436-1444

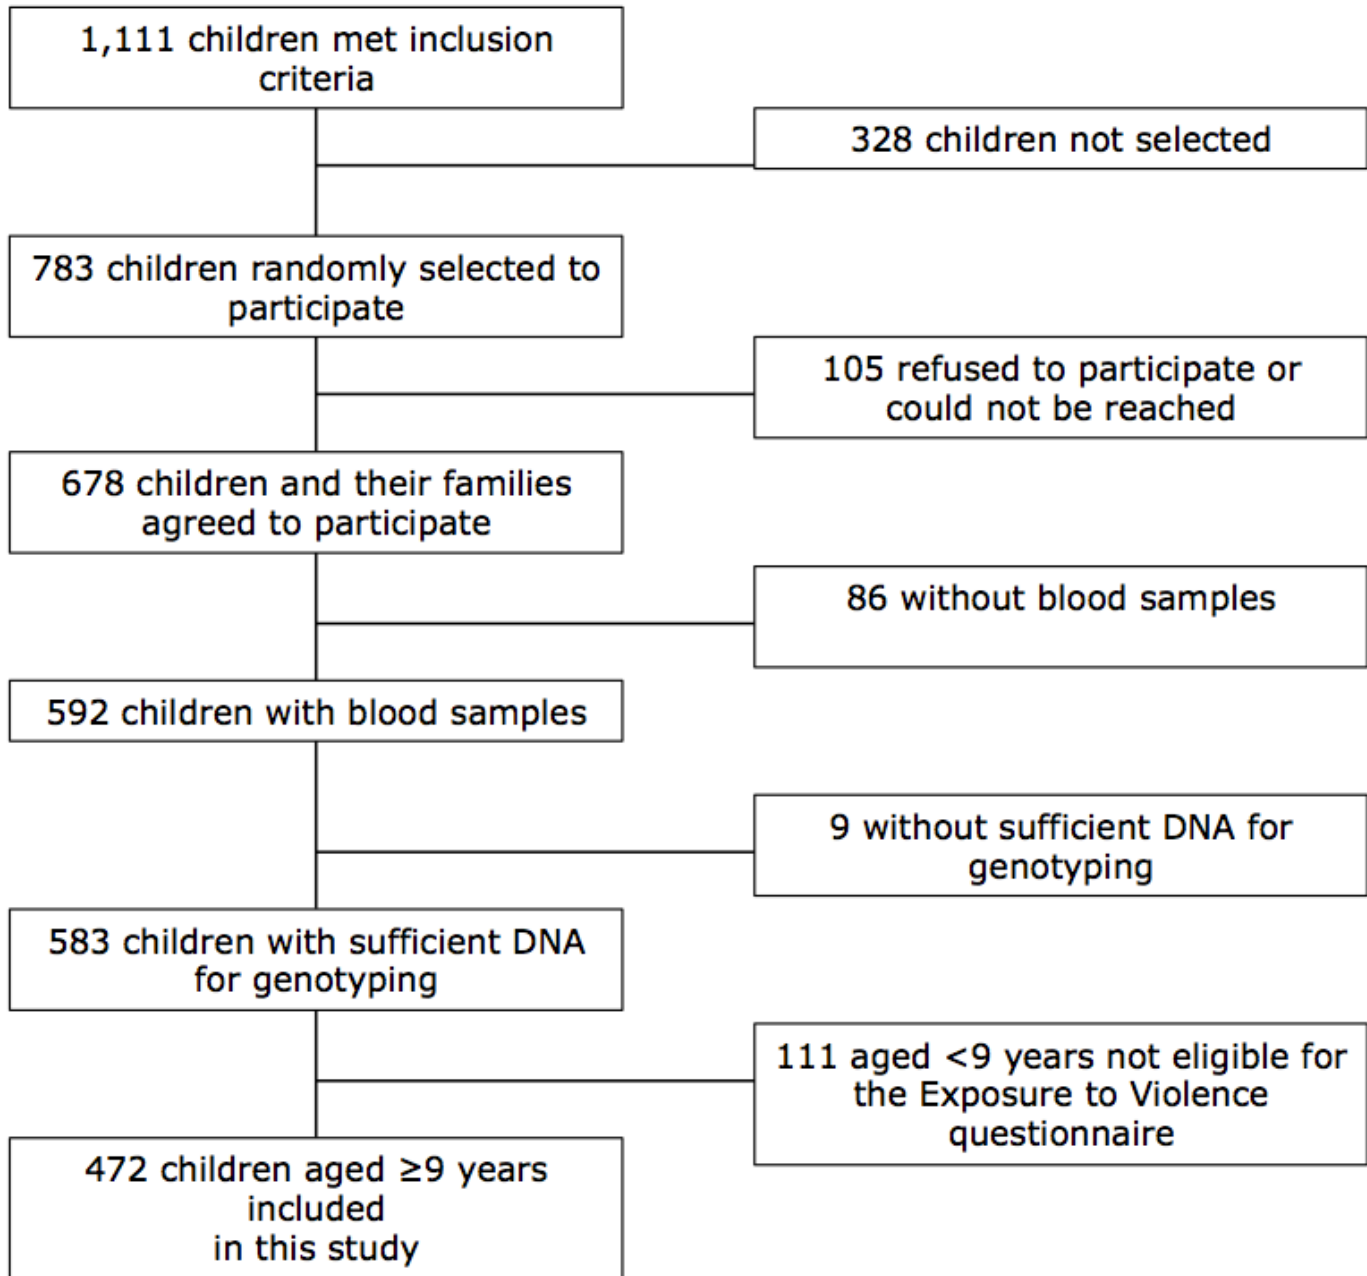

**e-Figure 1.** Flow diagram for subject recruitment in San Juan, Puerto Rico.

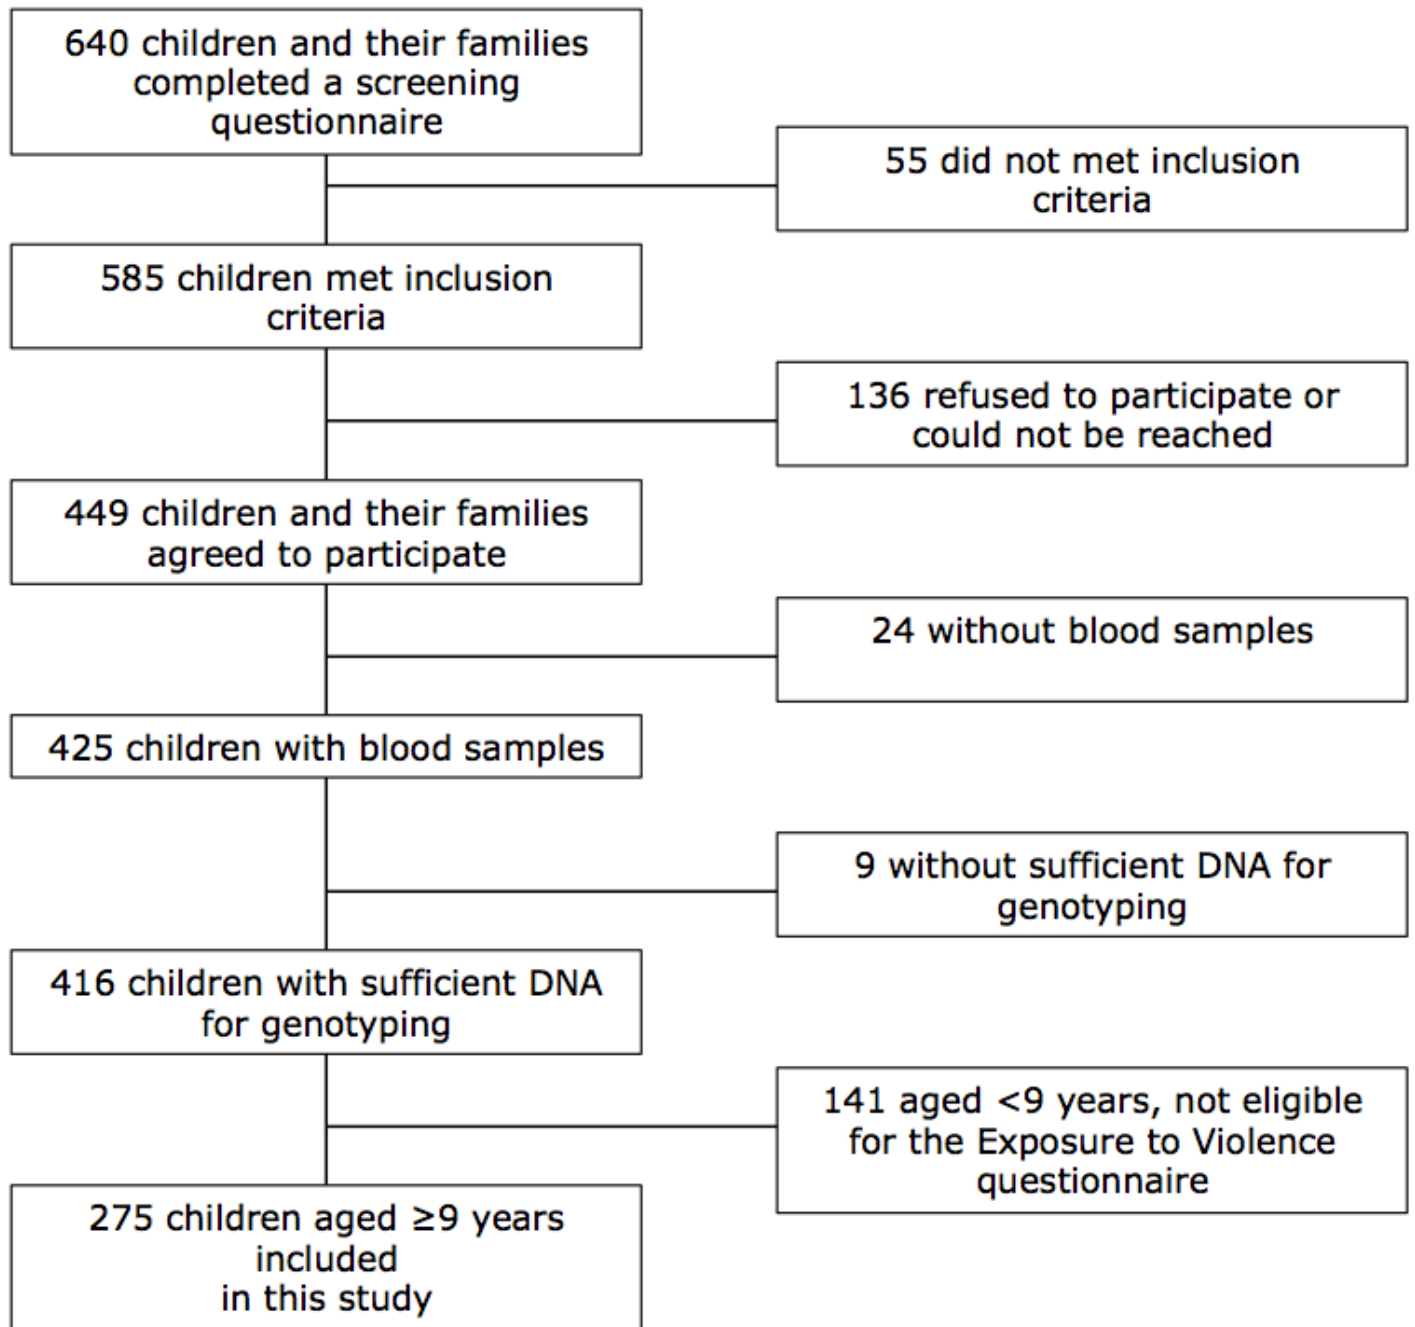

**e-Figure 2.** Flow diagram for subject recruitment in Hartford, Connecticut.

**e-Table 1.** Analysis of African ancestry and asthma in participating Puerto Rican children, according to study site and exposure to gun violence<sup>a,b,c</sup>

|                                                              | San Juan (n=466)                |                              | Hartford (n=185)                |                              |
|--------------------------------------------------------------|---------------------------------|------------------------------|---------------------------------|------------------------------|
|                                                              | <u>Exposure to gun violence</u> |                              | <u>Exposure to gun violence</u> |                              |
|                                                              | No (n=188)                      | Yes (n=278)                  | No (n=114)                      | Yes (n=71)                   |
| <u>Unadjusted</u>                                            |                                 |                              |                                 |                              |
| Each quartile increase in the percentage of African ancestry | 0.77 (0.58 to 1.03),<br>0.08    | 1.24 (0.99 to 1.56),<br>0.06 | 0.90 (0.62 to 1.31),<br>0.6     | 1.73 (1.04 to 2.90),<br>0.04 |
| <u>Adjusted<sup>d</sup></u>                                  |                                 |                              |                                 |                              |
| Each quartile increase in the percentage of African ancestry | 0.74 (0.53 to 1.03),<br>0.08    | 1.37 (1.06 to 1.77),<br>0.01 | 0.90 (0.60 to 1.34),<br>0.6     | 2.08 (1.10 to 3.91),<br>0.02 |

*Definition of abbreviations:* ETS = Environmental tobacco smoke.

<sup>a</sup>Asthma defined as physician-diagnosed asthma and wheeze in the previous year.

<sup>b</sup>Heard a gunshot more than once during her/his lifetime.

<sup>c</sup>Data presented as odds ratio (95% confidence interval), *P* value.

<sup>d</sup>Multivariate models were additionally adjusted for age, gender, exposure to environmental tobacco smoke in utero or prior to 2 years of age, household income, and maternal asthma in addition to the covariates listed in the first column.

**e-Table 2.** Analysis of African ancestry and serum total IgE in participating Puerto Rican children, according to study site and exposure to gun violence<sup>a,b,c</sup>

|                                                              | San Juan (n=466)             |                              | Hartford (n=185)              |                              |
|--------------------------------------------------------------|------------------------------|------------------------------|-------------------------------|------------------------------|
|                                                              | Exposure to gun violence     |                              | Exposure to gun violence      |                              |
|                                                              | No (n=188)                   | Yes (n=278)                  | No (n=114)                    | Yes (n=71)                   |
| <u>Unadjusted</u>                                            |                              |                              |                               |                              |
| Each quartile increase in the percentage of African ancestry | -4.55 (-22.80 to 18.01), 0.7 | 24.69 (3.91 to 49.64), 0.02  | -11.47 (-32.57 to 16.24), 0.4 | 28.85 (-10.24 to 84.94), 0.2 |
| <u>Adjusted<sup>c</sup></u>                                  |                              |                              |                               |                              |
| Each quartile increase in the percentage of African ancestry | -8.49 (-27.30 to 15.20), 0.4 | 18.74 (-1.51 to 43.15), 0.07 | -10.09 (-31.93 to 18.77), 0.5 | 20.13 (-20.04 to 80.45), 0.4 |

*Definition of abbreviations:* ETS = Environmental tobacco smoke.

<sup>a</sup>Serum total IgE levels transformed to a logarithmic (log10) scale for analyses. Results were back-transformed for ease of interpretation and are presented as percent increase or decrease in serum total IgE levels (95% confidence interval), *P* value.

<sup>b</sup>Heard a gunshot more than once during her/his lifetime.

<sup>c</sup>Multivariate models were additionally adjusted for age, gender, exposure to environmental tobacco smoke in utero or prior to 2 years of age, household income, maternal asthma, and case-control status.
